# Supplementary material for: Disruption of endocytic trafficking in frontotemporal dementia with CHMP2B mutations
Source: PubMed Central journal article supplement — Hum Mol Genet. 2010 Mar 10;19(11):2228–38. doi: 10.1093/hmg/ddq100 (PMC2865375; doi:10.1093/hmg/ddq100), 2010-03-10
Supplement: ddq100_1.pdf [file ddq100_1.pdf]

## Supplementary Material

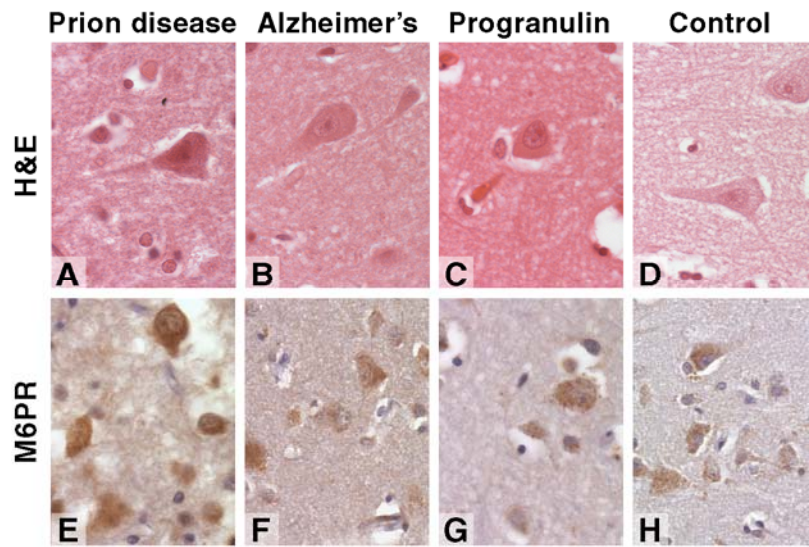

**Figure S1. Enlarged endosomal phenotype not present in disease-control brains.**

Frontal cortex sections from prion disease (A, E), Alzheimer's disease (B, F), frontotemporal dementia with progranulin mutation (C, G) and age-matched controls (D, H). Representative images of haematoxylin and eosin staining (H&E, A – D) and immunohistochemical staining against mannose-6-phosphate receptor (M6PR, E – H) are shown. Cytoplasmic M6PR-positive vacuoles, as visible in frontal cortical neurons of FTD-3 brains (Fig. 2 of the manuscript), are not observed. Scale bar represents 60 $\mu$ m.

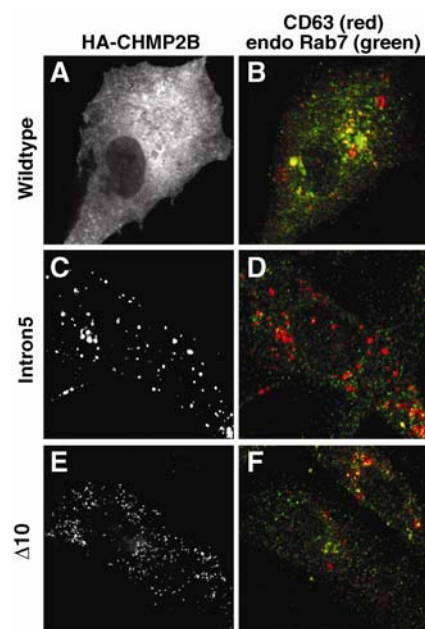

**Figure S2. Impaired recruitment of endogenous Rab7 onto endosomes in mutant CHMP2B expressing cells.**

SK-N-SH cells were transfected with HA-CHMP2B<sup>Wildtype</sup> (A, B), HA-CHMP2B<sup>Intron5</sup> (C, D) or HA-CHMP2B<sup>Δ10</sup> (E, F), and then immunostained for HA, Rab7 (green) and CD63 to visualise endosomes (red). Quantification (Fig. 8 of the manuscript) showed that expression of mutant CHMP2B led to a reduction in the percentage of CD63-positive endosomes that recruited Rab7. Scale bar = 10 $\mu$ m.

| Diagnosis | Sex | Age at death | PMI (h) |
|-----------|-----|--------------|---------|
| FTD-3     | F   | 69           | 18      |
|           | F   | 61           | NK      |
|           | F   | 76           | NK      |
|           | M   | 59           | NK      |
| Control   | F   | 65           | 30      |
|           | F   | 68           | 216     |
|           | F   | 79           | 38      |
|           | M   | 71           | 120     |
|           | M   | 57           | 79      |
|           | F   | 68           | 45      |
|           | M   | 71           | 39      |
|           | M   | 36           | NK      |
|           | F   | 78           | 168     |
| MAPT      | M   | 71           | 120     |
|           | M   | 68           | 31      |
|           | M   | 48           | 65      |
|           | F   | 63           | 22      |
| PGRN      | F   | 66           | 115     |
|           | F   | 68           | 100     |
| AD        | F   | 85           | 120     |
|           | F   | 79           | 96      |
|           | M   | 79           | 120     |
| fCJD      | F   | 49           | 96      |
|           | F   | 46           | 96      |
|           | M   | 43           | 216     |
| iCJD      | M   | 37           | 120     |
| sCJD      | M   | 86           | 120     |
|           | M   | 67           | 96      |
|           | F   | 59           | 120     |
| vCJD      | F   | 56           | 120     |
|           | M   | 18           | 144     |
|           | F   | 36           | 120     |
| GSS       | M   | 64           | 168     |
| FFI       | M   | 60           | 144     |

**Table S1. Patient information for M6PR brain immunohistochemistry.**

AD, Alzheimer's disease; MAPT, frontotemporal dementia with MAPT mutations; GRN, frontotemporal dementia with GRN mutations; fCJD, familial Creutzfeldt-Jakob disease; iCJD, iatrogenic CJD; sCJD, sporadic CJD; vCJD, variant CJD; GSS, Gerstmann-Sträussler-Scheinker syndrome; FFI, fatal familial insomnia; PMI, post-mortem interval in hours; NK, not known.

| <b>Primer</b>                                      | <b>Sequence</b>           |
|----------------------------------------------------|---------------------------|
| CHMP2B common forward primer                       | GACATCTTTGACGGTTCTGA      |
| CHMP2B <sup>Wildtype</sup> specific reverse primer | GAGCTTTGGCCATCTTTC        |
| CHMP2B <sup>Intron5</sup> specific reverse primer  | GAAAAGATGATGTTTCATACCTTTC |
| CHMP2B <sup>Δ10</sup> specific reverse primer      | CAGCTGATGGAGCTTTC         |
| FAM-labelled Taqman probe                          | TTCCAATTCATCAAGAAC        |

**Table S2. Nucleotide sequences for primers and probe used for quantitative real-time PCR of *CHMP2B* transcripts.**
